# Supplementary material for: Music Therapy in Infancy and Neurodevelopmental Outcomes in Preterm Children: A Secondary Analysis of the LongSTEP Randomized Clinical Trial
Source: PubMed Central journal article supplement (PMC11099691; doi:10.1001/jamanetworkopen.2024.10721), 2024-05-16
Supplement: jamanetwopen-e2410721-s002.pdf [file jamanetwopen-e2410721-s002.pdf]

## Supplemental Online Content

Bieleninik Ł, Kvestad I, Gold C, et al. Music therapy in infancy and neurodevelopmental outcomes in preterm children: a secondary analysis of the LongSTEP randomized clinical trial. *JAMA Netw Open*. 2024;7(5):e2410721. doi:10.1001/jamanetworkopen.2024.10721

**eAppendix.** Standardization Procedures of Neurodevelopmental Assessment With the Bayley Scales of Infant and Toddler Development, 3rd Edition (BISD-III)

**eTable 1.** Infant Baseline Characteristics of Those Followed-Up Versus Lost to Follow-Up

**eTable 2.** Completers by Country and Intervention Group

**eTable 3.** Clinical and Demographic Predictors of the Bayley Scales of Infant and Toddler Development, 3rd Edition (BISD-III) Language Composite Score

**eFigure 1.** Estimates of Clinical and Demographic Predictors of the Bayley Scales of Infant and Toddler Development, 3rd Edition (BISD-III) Language Composite Score

**eTable 4.** Intervention Effects by Selected Clinical/Demographic Predictors of the Bayley Scales of Infant and Toddler Development, 3rd Edition (BISD-III) Language Composite Score

**eTable 5.** Sensitivity Analysis: Estimates of Intervention Effects on the Bayley Scales of Infant and Toddler Development, 3rd Edition (BISD-III) Language Composite Score Using Multiple Imputation

**eFigure 2.** Estimates of Intervention Effects on the Bayley Scales of Infant and Toddler Development, 3rd Edition (BISD-III) Language Composite Score by Selected Clinical/Demographic Predictors

**eFigure 3.** Effects of Music Interventions on the Bayley Scales of Infant and Toddler Development, 3rd Edition (BISD-III) at 24 Months Across Studies

### eReferences

This supplemental material has been provided by the authors to give readers additional information about their work.

## **eAppendix. Standardization procedures of neurodevelopmental assessment with the Bayley Scales of Infant and Toddler Development, 3<sup>rd</sup> edition (BSID-III)**

The standardization procedures prior to assessments were adjusted to the assessors' level of experience. Those with no prior experience with BSID-III assessments (Poland) took part in five standardization exercises along with a video recording of an assessment evaluated by a project senior psychologist. In the standardization procedures, the assessors administered the test with a child at approximately 24 months while the other assessor observed and double scored. The assessors were ready to start with assessments for the LongSTEP study when an inter-rater agreement  $>0.9$  was reached in the standardization exercises and the video was approved by the project senior psychologists. Assessors with experience in BSID-III assessments (Argentina, Israel, Colombia and Norway) did not take part in these standardization procedures.

**eTable 1. Infant baseline characteristics of those followed-up versus lost to follow-up**

| Baseline characteristic                        | Followed up at 24 months |                                | Not followed up |                                | Test for difference |
|------------------------------------------------|--------------------------|--------------------------------|-----------------|--------------------------------|---------------------|
|                                                | N                        | No. (%)                        | N               | No. (%)                        | p-value             |
| <b>Sex (female)</b>                            | 111                      | 59 (53)                        | 95              | 44 (46)                        | 0.4017 <sup>2</sup> |
| <b>Singleton pregnancy</b>                     | 111                      | 83 (75)                        | 95              | 62 (65)                        | 0.181 <sup>2</sup>  |
| <b>Cesarean delivery route</b>                 | 111                      | 87 (78)                        | 95              | 81 (85)                        | 0.2758 <sup>2</sup> |
| <b>Birth weight (grams), mean (sd)</b>         | 111                      | 1382 (414)<br>[480, 2335]      | 94              | 1423 (456)<br>[590, 2440]      | 0.5064 <sup>3</sup> |
| <b>GA at birth (weeks), mean (sd)</b>          | 111                      | 30.41 (2.59)<br>[22.86, 34.29] | 95              | 30.56 (2.73)<br>[22.86, 34.71] | 0.6875 <sup>3</sup> |
| <b>GA &lt;28 weeks</b>                         |                          | 20 (18)                        |                 | 16 (17)                        | 0.3852 <sup>4</sup> |
| <b>GA 28-32 weeks</b>                          |                          | 51 (46)                        |                 | 36 (38)                        |                     |
| <b>GA 32-35 weeks</b>                          |                          | 40 (36)                        |                 | 43 (45)                        |                     |
| <b>PMA enrollment (weeks), mean (sd)</b>       | 111                      | 33.05 (1.86)<br>[27.43, 37.57] | 95              | 33.1 (2.08)<br>[28.71, 44.00]  | 0.8711 <sup>3</sup> |
| <b>Apgar score at 5min, mean (sd)</b>          | 109                      | 8.7 (1.42)<br>[1, 10]          | 92              | 8.5 (1.25)<br>[5, 10]          | 0.5064 <sup>3</sup> |
| <b>Weight at enrollment (grams), mean (sd)</b> | 109                      | 1614 (380)<br>[705, 2730]      | 94              | 1626 (460)<br>[759, 3680]      | 0.8466 <sup>3</sup> |
| <b>Estimated severity of IVH<sup>1</sup></b>   | 111                      |                                | 95              |                                | 0.2825 <sup>4</sup> |
| Cranial Ultrasound not indicated               |                          | 43 (39)                        |                 | 44 (46)                        |                     |
| None                                           |                          | 53 (48)                        |                 | 44 (46)                        |                     |
| Grade 1-2                                      |                          | 15 (13)                        |                 | 4 (5)                          |                     |
| Grade 3-4                                      |                          | 0 (0)                          |                 | 3 (3)                          |                     |

Abbreviations: SD, standard deviation; GA, gestational age; PMA, post-menstrual age; IVH, intraventricular hemorrhage <sup>1</sup>IVH was diagnosed by cranial ultrasound and graded according to Papile et al.<sup>1</sup> <sup>2</sup>From two-sided Z-test; <sup>3</sup>From two-sided t-test; <sup>4</sup>From chi square test

**eTable 2. Completers by country and intervention group**

|              | SCSC        | MTSC        | SCMT        | MTMT        | Total |
|--------------|-------------|-------------|-------------|-------------|-------|
| <b>ARG</b>   | 0/2 (0%)    | 1/5 (20%)   | 1/5 (20%)   | 0/2 (0%)    | 14    |
| <b>COL</b>   | 2/18 (11%)  | 7/15 (47%)  | 6/16 (38%)  | 11/18 (61%) | 67    |
| <b>ISR</b>   | 10/13 (77%) | 10/14 (71%) | 13/14 (93%) | 9/13 (69%)  | 54    |
| <b>NOR</b>   | 6/7 (86%)   | 6/8 (75%)   | 4/9 (44%)   | 6/9 (67%)   | 33    |
| <b>POL</b>   | 6/10 (60%)  | 5/9 (56%)   | 2/9 (22%)   | 5/10 (50%)  | 38    |
| <b>Total</b> | 50          | 51          | 53          | 52          | 206   |

Abbreviations: SCSC, Standard care Standard care; MTSC, Music therapy Standard care; SCMT, Standard care Music therapy; MTMT, Music therapy Music therapy; ARG, Argentina; COL, Colombia; ISR, Israel; NOR, Norway; POL, Poland

*Note.* Showing completers (valid BSID-III Language Composite Score), totals, and percentage of completers by country and intervention group. No significant association of completers between country and intervention group was found (Fisher's Exact Test for Count Data,  $p = 0.468$ ).

**eTable 3. Clinical and demographic predictors of the Bayley Scales of Infant and Toddler Development, 3<sup>rd</sup> edition (BISD-III) Language Composite score**

| <i>Predictors</i>                                    | <b>Language Composite</b> |                |          |
|------------------------------------------------------|---------------------------|----------------|----------|
|                                                      | <i>Estimates</i>          | <i>CI</i>      | <i>p</i> |
| (Intercept)                                          | 80.62 **                  | 26.67 – 134.58 | 0.004    |
| GA at birth                                          | 0.71                      | -0.99 – 2.41   | 0.408    |
| Male sex                                             | -9.30 *                   | -17.38 – -1.22 | 0.025    |
| Skin-to-skin care until discharge $\geq$ 4 days/week | 5.19                      | -9.63 – 20.02  | 0.488    |
| University degree mother                             | 0.19                      | -10.65 – 11.04 | 0.972    |
| University degree father                             | 0.03                      | -8.95 – 9.01   | 0.994    |
| Caeserean delivery                                   | -1.20                     | -10.72 – 8.31  | 0.802    |
| Multiple birth                                       | 0.38                      | -8.80 – 9.55   | 0.935    |
| Oxygen supplementation before discharge              | -18.48 *                  | -33.93 – -3.02 | 0.020    |
| Abnormal head ultrasound before discharge            | 6.41                      | -6.02 – 18.85  | 0.308    |
| <b>Random Effects</b>                                |                           |                |          |
| $\sigma^2$                                           | 362.55                    |                |          |
| $\tau_{00}$ site                                     | 6.19                      |                |          |
| $N$ site                                             | 8                         |                |          |
| Observations                                         | 98                        |                |          |
| Marginal R <sup>2</sup> / Conditional R <sup>2</sup> | 0.167 / NA                |                |          |

\*  $p < 0.05$  \*\*  $p < 0.01$  \*\*\*  $p < 0.001$

*Note.* Based on a linear mixed-effects model with site as random effects. Effects of oxygen supplementation were also explored by country (Colombia versus others). Oxygen supplementation was very common at the Colombian site because its high altitude. It did not predict scores there, thus masking an even larger effect when Colombia was removed (not shown).

**eFigure 1. Estimates of clinical and demographic predictors of the Bayley Scales of Infant and Toddler Development, 3<sup>rd</sup> edition (BISD-III) Language Composite score**

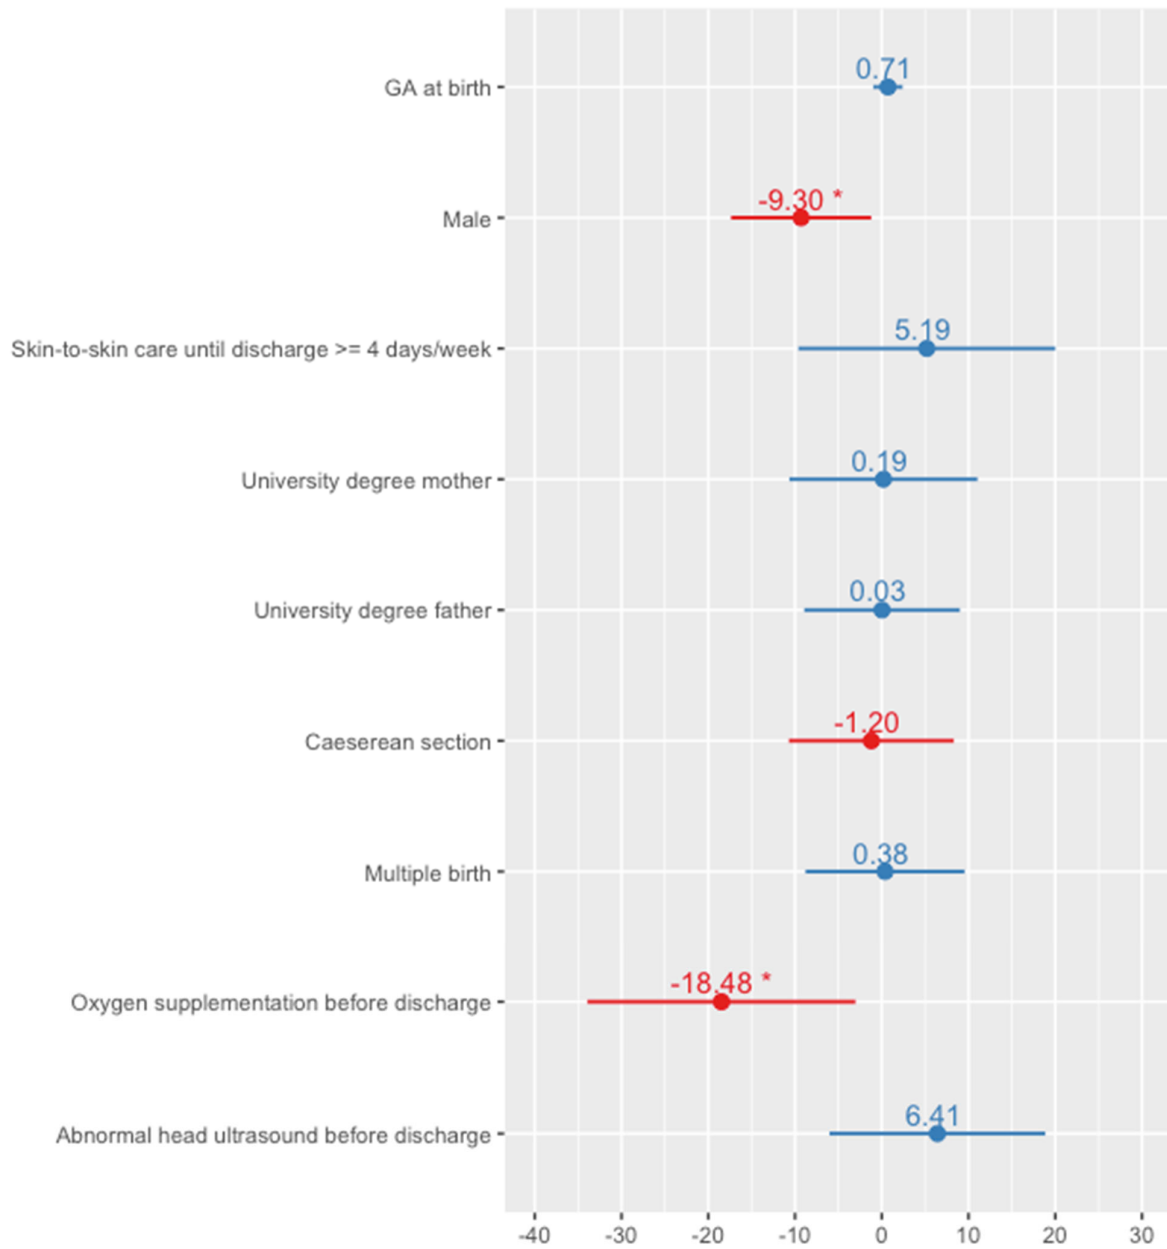

Note. Graphical display of the estimates in the model presented in eTable 3.

**eTable 4. Intervention effects by selected clinical/demographic predictors of the Bayley Scales of Infant and Toddler Development, 3<sup>rd</sup> edition (BISD-III) Language Composite score**

| <i>Predictors</i>                          | <b>Language Composite</b> |                |          |
|--------------------------------------------|---------------------------|----------------|----------|
|                                            | <i>Estimates</i>          | <i>CI</i>      | <i>p</i> |
| (Intercept)                                | 100.31 ***                | 89.56 – 111.05 | <0.001   |
| MTSC                                       | 1.77                      | -12.38 – 15.92 | 0.804    |
| SCMT                                       | 3.53                      | -11.38 – 18.45 | 0.639    |
| MTMT                                       | 2.28                      | -13.04 – 17.59 | 0.769    |
| Male sex                                   | -6.64                     | -21.46 – 8.17  | 0.375    |
| Oxygen supplementation before discharge    | 3.40                      | -23.47 – 30.26 | 0.802    |
| MTSC X Male sex                            | -5.01                     | -25.33 – 15.31 | 0.625    |
| SCMT X Male sex                            | 3.52                      | -17.08 – 24.12 | 0.735    |
| MTMT X Male sex                            | -3.43                     | -23.29 – 16.43 | 0.732    |
| MTSC X Oxygen suppl.                       | -18.90                    | -50.12 – 12.32 | 0.232    |
| SCMT X Oxygen suppl.                       | -19.25                    | -50.94 – 12.43 | 0.231    |
| MTMT X Oxygen suppl.                       | -23.01                    | -53.31 – 7.28  | 0.135    |
| <b>Random Effects</b>                      |                           |                |          |
| $\sigma^2$                                 | 333.58                    |                |          |
| $\tau_{00 \text{ site}}$                   | 0.78                      |                |          |
| ICC                                        | 0.00                      |                |          |
| $N_{\text{site}}$                          | 8                         |                |          |
| Observations                               | 110                       |                |          |
| Marginal $R^2$ / Conditional $R^2$         | 0.182 / 0.184             |                |          |
| * $p < 0.05$ ** $p < 0.01$ *** $p < 0.001$ |                           |                |          |

Abbreviations: MTSC, Music therapy Standard care; SCMT, Standard care Music therapy; MTMT, Music therapy Music therapy; ICC, Intraclass correlation; N, Number

Note. Based on a linear mixed-effects model, selecting significant predictors from eTable 3 for interaction with intervention group.

**eTable 5. Sensitivity analysis: Estimates of intervention effects on the Bayley Scales of Infant and Toddler Development, 3<sup>rd</sup> edition (BISD-III) Language Composite score using multiple imputation**

| <b>Language Composite</b> |                  |           |          |
|---------------------------|------------------|-----------|----------|
| <i>Predictors</i>         | <i>Estimates</i> | <i>SE</i> | <i>p</i> |
| (Intercept)               | 91.52 ***        | 5.26      | <0.001   |
| MTSC                      | -0.54            | 4.15      | 0.897    |
| SCMT                      | 2.51             | 4.97      | 0.619    |
| MTMT                      | -3.61            | 4.30      | 0.406    |

\*  $p < 0.05$  \*\*  $p < 0.01$  \*\*\*  $p < 0.001$

Abbreviations: MTSC, Music therapy Standard care; SCMT, Standard care Music therapy; MTMT, Music therapy Music therapy  
*Note.* Pooled summary of linear mixed-effects models from 5 complete datasets generated with multiple imputation (R package mice, using predictive mean matching for continuous variables and logistic regression for binary variables; including selected clinical/demographic variables, site, intervention group, and all outcomes in the imputation).



**eFigure 2. Estimates of intervention effects on the Bayley Scales of Infant and Toddler Development, 3<sup>rd</sup> edition (BISD-III) Language Composite score by selected clinical/demographic predictors**

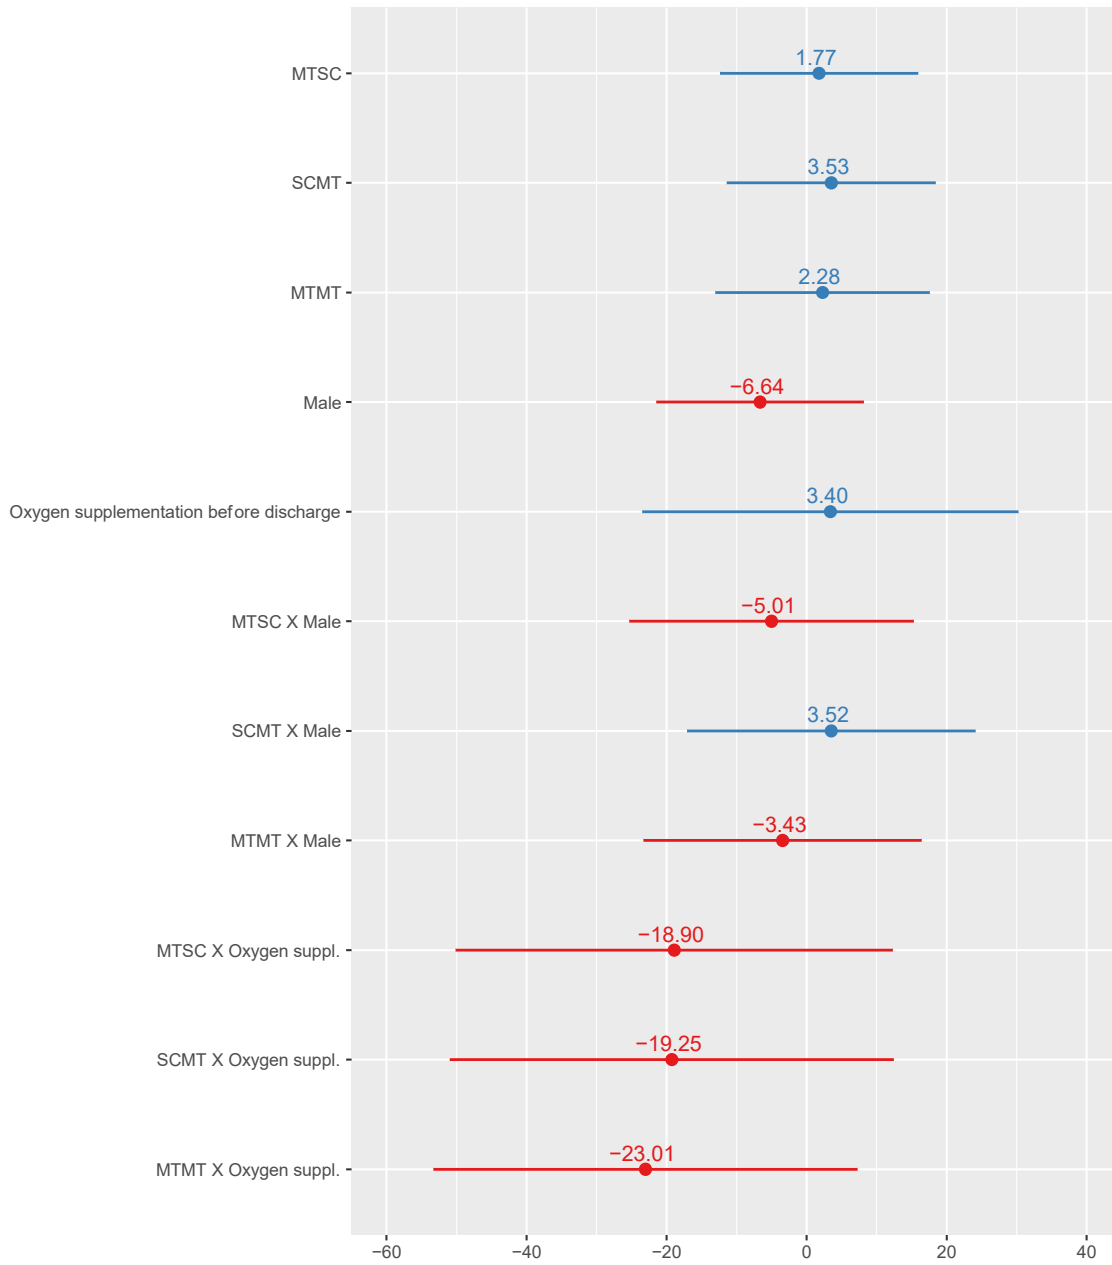

Note. Graphical display of the estimates in the model presented in eTable 4.

**Figure 3. Effects of music interventions on the Bayley Scales of Infant and Toddler Development, 3<sup>rd</sup> edition (BISD-III) at 24 months across studies**

*a) Language Composite*

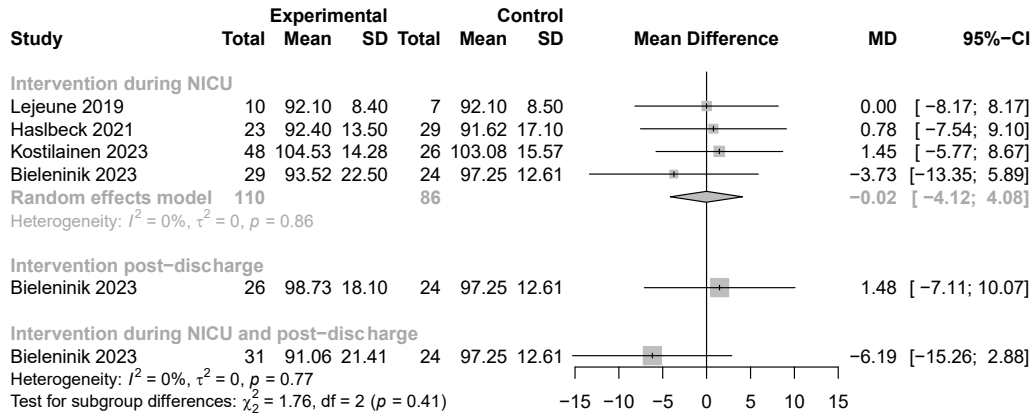

*b) Motor composite*

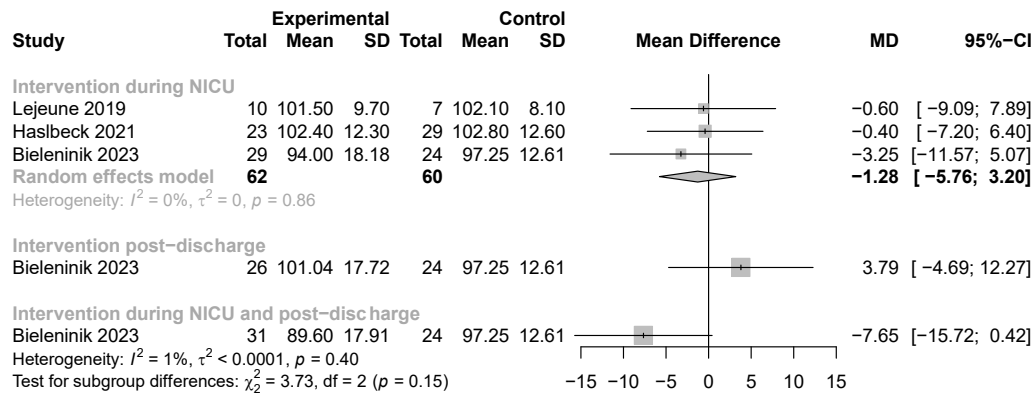

*c) Cognitive Composite*

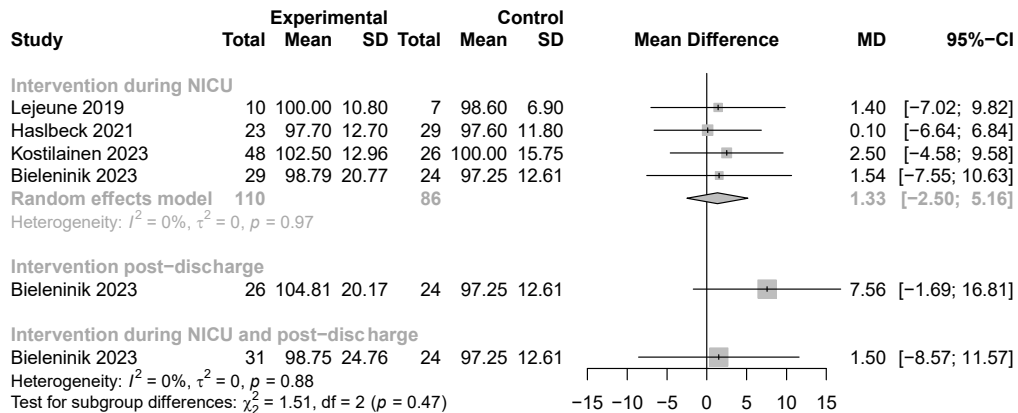

Note: We present random-effects meta-analyses because of high clinical heterogeneity between interventions. Lejeune et al.<sup>2</sup> used music listening to recorded music without a music therapist (tracks were created by a nurse); Haslbeck et al.<sup>3</sup> used creative MT where the music therapist led the intervention; Bieleninik et al (present study) used parent-led, infant-directed singing predominantly led by the parent. End

of intervention post-discharge refers to 6 months in Bieleninik et al. Effects of intervention during NICU and post-discharge refers to music therapist provided 3 times weekly in NICU and 7 sessions post-NICU across 6 months in Bieleninik et al.

## eReferences

1. Papile LA, Burstein J, Burstein R, Koffler H. Incidence and evolution of subependymal and intraventricular hemorrhage: a study of infants with birth weights less than 1,500 gm. *The Journal of Pediatrics*. 1978;92(4):529–534. doi:10.1016/s0022-3476(78)80282-0
2. Lejeune F, Lordier L, Pittet MP, et al. Effects of an Early Postnatal Music Intervention on Cognitive and Emotional Development in Preterm Children at 12 and 24 Months: Preliminary Findings. *Frontiers in Psychology*. 2019;10(494)doi:10.3389/fpsyg.2019.00494
3. Haslbeck FB, Bucher HU, Bassler D, Hagmann C, Natalucci G. Creative Music Therapy and Neurodevelopmental Outcomes in Pre-term Infants at 2 Years: A Randomized Controlled Pilot Trial. *Frontiers in Pediatrics*. 2021;9:660393. doi:10.3389/fped.2021.660393
