# Supplementary material for: Music Therapy in Infancy and Neurodevelopmental Outcomes in Preterm Children: A Secondary Analysis of the LongSTEP Randomized Clinical Trial
Source: PubMed Central journal article supplement (PMC11099691; doi:10.1001/jamanetworkopen.2024.10721), 2024-05-16
Supplement: jamanetwopen-e2410721-s003.pdf [file jamanetwopen-e2410721-s003.pdf]

## Data Sharing Statement

Bieleninik. Music Therapy in Infancy and Neurodevelopmental Outcomes in Preterm Children. *JAMA Netw Open*. Published May 16, 2024. doi:10.1001/jamanetworkopen.2024.10721

### Data

**Data available:** Yes

**Data types:** Deidentified participant data

**How to access data:** De-identified datasets (site codes, allocation, primary and secondary outcomes) are stored in a publicly available repository (<https://osf.io/smjka/>) and will be made available with publication.

**When available:** With publication

### Supporting Documents

**Document types:** Statistical/analytic code

**How to access documents:** Statistical analysis scripts generated during the LongSTEP trial are stored in a publicly available repository (<https://osf.io/smjka/>) and will be made available with publication.

**When available:** With publication

### Additional Information

**Who can access the data:** anyone requesting the data

**Types of analyses:** any purpose

**Mechanisms of data availability:** with investigator support
